# Supplementary material for: Machine Learning Driven Optimization of Carbon Sequestration in Intercropping Systems Using XGBoost Modeling and Partial Dependence Analysis
Source: Research Square preprint supplement (doi:10.21203/rs.3.rs-7307700/v1), 2025-09-22
Supplement: Supplementary file 1 [file f65b15581fca9ab0a0755c5c.docx]

**Supplementary Files**

**ST 1: Carbon equivalent (CO2-Ce Mg ha-1 year-1) and unit input applied under different tillage and residue management practices in pigeonpea + maize inter cropping system**

| **Energy sources** | **Rate (kg CO2-Ce)** | **MT-B-PM (1:2)** | **MT-R-PM (1:2)** | **MT-C-PM (1:2)** | **MT-B-PM (1:3)** | **MT-R-PM (1:3)** | **MT-C-PM (1:3)** | **MT-B-P** | **MT-R-P** | **MT-C-P** | **MT-B-M** | **MT-R-M** | **MT-C-M** | **CT-B-PM (1:2)** | **CT-R-PM (1:2)** | **CT-C-PM (1:2)** | **CT-B-PM (1:3)** | **CT-R-PM (1:3)** | **CT-C-PM (1:3)** | **CT-B-P** | **CT-R-P** | **CT-C-P** | **CT-B-M** | **CT-R-M** | **CT-C-M** |
| --- | --- | --- | --- | --- | --- | --- | --- | --- | --- | --- | --- | --- | --- | --- | --- | --- | --- | --- | --- | --- | --- | --- | --- | --- | --- |
| 1. **Input/ha** | | | | | | | | | | | | | | | | | | | | | | | | | |
| 1. **Labour and Sowing** | | | | | | | | | | | | | | | | | | | | | | | | | |
| Adult (man days) | (1.96 MJ h-1) 0.86 kg CO2/MJ | 34 | 33 | 28.5 | 36.5 | 33 | 31.5 | 24 | 22.5 | 21.5 | 34 | 32.5 | 28.5 | 37 | 33.5 | 30.5 | 39 | 34.5 | 34.5 | 25.5 | 24.5 | 22.5 | 34 | 32.5 | 30.5 |
| Women (woman days) | (1.96 MJ/H) 0.86 kg CO2/MJ | 42.5 | 41 | 38.5 | 44 | 41 | 39.5 | 26.5 | 24.5 | 22.5 | 44.5 | 41.5 | 39.5 | 44.5 | 41.5 | 40.5 | 45.5 | 42.5 | 41.5 | 28.5 | 26.5 | 24.5 | 47 | 43 | 40.5 |
| Pigeonpea seeds (kg) | 3.67 (45% C) | 8 | 8 | 8 | 8 | 8 | 8 | 8 | 8 | 8 | 0 | 0 | 0 | 8 | 8 | 8 | 8 | 8 | 8 | 8 | 8 | 8 | 0 | 0 | 0 |
| Maize seeds (kg) | 3.67 (45% C) | 6.6 | 6.6 | 6.6 | 7.5 | 7.5 | 7.5 | 0 | 0 | 0 | 10 | 10 | 10 | 6.6 | 6.6 | 6.6 | 7.5 | 7.5 | 7.5 | 0 | 0 | 0 | 10 | 10 | 10 |
| 1. **Land preparation and treatment imposition** | | | | | | | | | | | | | | | | | | | | | | | | | |
| Tractor (hr) | (68.4MJ) 0.89 | 2 | 2 | 2 | 2 | 2 | 2 | 2 | 2 | 2 | 2 | 2 | 2 | 3 | 3 | 3 | 3 | 3 | 3 | 3 | 3 | 3 | 3 | 3 | 3 |
| Mould board plough (hr) | (82.73 MJ) 0.89 | 0 | 0 | 0 | 0 | 0 | 0 | 0 | 0 | 0 | 0 | 0 | 0 | 2 | 2 | 2 | 2 | 2 | 2 | 2 | 2 | 2 | 2 | 2 | 2 |
| Disc plough (hr) | (69.22 MJ) 0.89 | 2 | 2 | 2 | 2 | 2 | 2 | 2 | 2 | 2 | 2 | 2 | 2 | 2 | 2 | 2 | 2 | 2 | 2 | 2 | 2 | 2 | 2 | 2 | 2 |
| Cultivator (hr) | (19.16 MJ) 0.89 | 2 | 2 | 2 | 2 | 2 | 2 | 2 | 2 | 2 | 2 | 2 | 2 | 2 | 2 | 2 | 2 | 2 | 2 | 2 | 2 | 2 | 2 | 2 | 2 |
| Rotavator (hr) | (30.0 MJ) 0.89 | 2 | 2 | 2 | 2 | 2 | 2 | 2 | 2 | 2 | 2 | 2 | 2 | 2 | 2 | 2 | 2 | 2 | 2 | 2 | 2 | 2 | 2 | 2 | 2 |
| Disel (l) | (56.31 MJ) 0.94 | 18 | 18 | 18 | 18 | 18 | 18 | 18 | 18 | 18 | 18 | 18 | 18 | 21 | 21 | 21 | 21 | 21 | 21 | 21 | 21 | 21 | 21 | 21 | 21 |
| Biochar (kg) | 0.56 | 5000 | - | 0 | 5000 | - | 0 | 5000 | - | - | 5000 | - | - | 5000 | - | - | 5000 | - | - | 5000 | - | - | 5000 | - | - |
| Residue (kg) | 0.44 | - | 5200 | - | - | 5200 | - | - | 5200 | - | - | 5200 | - | - | 5200 | - | - | 5200 | - | - | 5200 | - | - | 5200 | - |
| 1. **Fertilizer application (As basal dose)** | | | | | | | | | | | | | | | | | | | | | | | | | |
| Nitrogen Basal (kg) | 1.52 | 80.0 | 80.0 | 80.0 | 67.5 | 67.5 | 67.5 | 20 | 20 | 20 | 90 | 90 | 90 | 80.0 | 80.0 | 80.0 | 67.5 | 67.5 | 67.5 | 20 | 20 | 20 | 90 | 90 | 90 |
| P2O5 (kg) | 0.2 | 66.66 | 66.66 | 66.66 | 75 | 75 | 75 | 50 | 50 | 50 | 60 | 60 | 60 | 66.66 | 66.66 | 66.66 | 75 | 75 | 75 | 50 | 50 | 50 | 60 | 60 | 60 |
| K2O (kg) | 0.15 | 26.7 | 26.664 | 26.664 | 30 | 30 | 30 | 0 | 0 | 0 | 40 | 40 | 40 | 26.664 | 26.664 | 26.664 | 30 | 30 | 30 | 0 | 0 | 0 | 40 | 40 | 40 |
| D **Fertilizer application (As top dressing)** | | | | | | | | | | | | | | | | | | | | | | | | | |
| Nitrogen Top dress (kg) | 1.52 | 79.99 | 79.994 | 79.994 | 67.5 | 67.5 | 67.5 | 0 | 0 | 0 | 90 | 90 | 90 | 79.994 | 79.994 | 79.994 | 67.5 | 67.5 | 67.5 | 0 | 0 | 0 | 90 | 90 | 90 |
| **E. Herbicides application** | | | | | | | | | | | | | | | | | | | | | | | | | |
| Pendimithalin (kg) | 6.3 | 3.75 | 3.75 | 3.75 | 3.75 | 3.75 | 3.75 | 3.75 | 3.75 | 3.75 | 2.5 | 2.5 | 2.5 | 3.75 | 3.75 | 3.75 | 3.75 | 3.75 | 3.75 | 3.75 | 3.75 | 3.75 | 2.50 | 2.50 | 2.50 |
| For Application | 0.89 | 1 | 1 | 1 | 1 | 1 | 1 | 1 | 1 | 1 | 1 | 1 | 1 | 1 | 1 | 1 | 1 | 1 | 1 | 1 | 1 | 1 | 1 | 1 | 1 |
| **F. Insecticide and fungicide application** | | | | | | | | | | | | | | | | | | | | | | | | | |
| Emamectin benzoate (kg) | 4.88 | 0.83 | 0.83 | 0.83 | 0.575 | 0.575 | 0.575 | 0.5 | 0.5 | 0.5 | 0.2 | 0.2 | 0.2 | 0.83 | 0.83 | 0.83 | 0.575 | 0.575 | 0.575 | 0.5 | 0.5 | 0.5 | 0.20 | 0.20 | 0.20 |
| Acephate (kg) | 4.88 | 1.24 | 1.24 | 1.24 | 1.3425 | 1.3425 | 1.3425 | 0.75 | 0.75 | 0.75 | 0.8 | 0.8 | 0.8 | 1.24 | 1.24 | 1.24 | 1.3425 | 1.3425 | 1.3425 | 0.75 | 0.75 | 0.75 | 0.80 | 0.80 | 0.80 |
| Chlorantraniliprole (kg) | 4.88 | 0.133 | 0.133 | 0.133 | 0.15 | 0.15 | 0.15 | 0 | 0 | 0 | 0.6 | 0.6 | 0.6 | 0.133 | 0.133 | 0.133 | 0.15 | 0.15 | 0.15 | 0 | 0 | 0 | 0.60 | 0.60 | 0.60 |
| Copper oxy chloride (kg) | 4.88 | 1.5 | 1.5 | 1.5 | 1.5 | 1.5 | 1.5 | 1.5 | 1.5 | 1.5 | 1.5 | 1.5 | 1.5 | 1.5 | 1.5 | 1.5 | 1.5 | 1.5 | 1.5 | 1.5 | 1.5 | 1.5 | 1.5 | 1.5 | 1.5 |
| For application | 0.89 | 1 | 1 | 1 | 1.5 | 1.5 | 1.5 | 0.5 | 0.5 | 0.5 | 1.5 | 1.5 | 1.5 | 1 | 1 | 1 | 1.5 | 1.5 | 1.5 | 0.5 | 0.5 | 0.5 | 1.5 | 1.5 | 1.5 |
| 1. **Out put/ha** | | | | | | | | | | | | | | | | | | | | | | | | | |
| Grain yield (Pigeonpea Eq. Yield (t/ha) | 3.67 (45% c) | 3.18 | 3.09 | 2.50 | 3.03 | 2.74 | 2.22 | 1.54 | 1.42 | 1.25 | 1.83 | 1.75 | 1.32 | 3.85 | 3.39 | 2.58 | 3.37 | 3.10 | 2.07 | 1.97 | 1.71 | 1.35 | 2.25 | 2.09 | 1.44 |
| Straw (t/ha) | 3.67 (43 % c | 13.10 | 12.55 | 10.71 | 12.18 | 11.17 | 9.74 | 5.83 | 5.43 | 4.68 | 13.59 | 12.57 | 10.66 | 15.64 | 13.53 | 11.10 | 13.88 | 12.40 | 9.08 | 7.04 | 6.28 | 5.03 | 13.59 | 12.57 | 10.66 |
| SOC Seq | 3.67 | 2.13 | 1.91 | 0.96 | 2.06 | 1.96 | 1.20 | 2.50 | 2.03 | 1.23 | 1.87 | 1.61 | 0.83 | 2.05 | 1.38 | 0.80 | 2.05 | 1.90 | 0.75 | 1.25 | 0.83 | 0.24 | 2.00 | 1.59 | 0.38 |

*Labour (man-days/ women-days=8 hours) having energy equivalent of 1.96 J h-1, Machinery having Energy equivalents viz., Tractor (hr) - 68.4MJ, Mould board plough (hr) 82.73 MJ, Disc plough (hr)-69.22 MJ, Cultivator (hr)-19.16 MJ, Rotavator (hr)- 30.0 MJ, Disel (l)-56.31 MJ having Energy equivalent of 62.1 MJ h-1; Seed kg ha-1 (Pigeonpea equivalent)*

**Treatments details :** P + M (1:2) with Biochar (MT), P + M (1:2) with Residue (MT), P + M (1:2) with Control (MT), P + M (1:3) with Biochar (MT), P + M (1:3) with Residue (MT), P + M (1:3) with Control (MT), Sole Pigeonpea with Biochar (MT), Sole Pigeonpea with Residue (MT), Sole Pigeonpeawith Control (MT), Sole Maize with Biochar (MT), Sole Maize with Residue (MT), Sole Maize with Control (MT), P + M (1:2) with Biochar (CT), P + M (1:2) with Residue (CT), P + M (1:2) with Control (CT), P + M (1:3) with Biochar (CT), P + M (1:3) with Residue (CT), P + M (1:3) with Control (CT), Sole Pigeonpea with Biochar (CT), Sole Pigeonpea with Residue (CT), Sole Pigeonpeawith Control (CT), Sole Maize with Biochar (CT), Sole Maize with Residue (CT), Sole Maize with Control (CT)

Where, P = Pigeonpea, M=maize, MT= Minimum Tillage, CT=Conventional Tillage

**ST 2: Carbon equivalent (CO2-Ce Mg ha-1 year-1) of various carbon input and output sources under different tillage and residue management practices in pigeonpea + maize inter cropping system**

|  |  | **MT-B-PM (1:2)** | **MT-R-PM (1:2)** | **MT-C-PM (1:2)** | **MT-B-PM (1:3)** | **MT-R-PM (1:3)** | **MT-C-PM (1:3)** | **MT-B-P** | **MT-R-P** | **MT-C-P** | **MT-B-M** | **MT-R-M** | **MT-C-M** | **CT-B-PM (1:2)** | **CT-R-PM (1:2)** | **CT-C-PM (1:2)** | **CT-B-PM (1:3)** | **CT-R-PM (1:3)** | **CT-C-PM (1:3)** | **CT-B-P** | **CT-R-P** | **CT-C-P** | **CT-B-M** | **CT-R-M** | **CT-C-M** |
| --- | --- | --- | --- | --- | --- | --- | --- | --- | --- | --- | --- | --- | --- | --- | --- | --- | --- | --- | --- | --- | --- | --- | --- | --- | --- |
| **Carbon Sources** | **Labour** | 1.03 | 0.98 | 0.90 | 1.09 | 1.00 | 0.96 | 0.68 | 0.63 | 0.59 | 1.16 | 1.00 | 0.92 | 1.10 | 1.01 | 0.96 | 1.14 | 1.04 | 1.02 | 0.73 | 0.69 | 0.63 | 1.09 | 1.02 | 0.96 |
| **Seed** | 0.01 | 0.05 | 0.05 | 0.06 | 0.06 | 0.06 | 0.03 | 0.03 | 0.03 | 0.04 | 0.04 | 0.04 | 0.05 | 0.05 | 0.05 | 0.06 | 0.06 | 0.06 | 0.03 | 0.03 | 0.03 | 0.04 | 0.04 | 0.04 |
| **Fertilizer** | 0.26 | 0.26 | 0.26 | 0.22 | 0.22 | 0.22 | 0.04 | 0.04 | 0.04 | 0.29 | 0.29 | 0.29 | 0.26 | 0.26 | 0.26 | 0.22 | 0.22 | 0.22 | 0.04 | 0.04 | 0.04 | 0.29 | 0.29 | 0.29 |
| **Disel** | 0.95 | 0.95 | 0.95 | 0.95 | 0.95 | 0.95 | 0.95 | 0.95 | 0.95 | 0.95 | 0.95 | 0.95 | 1.11 | 1.11 | 1.11 | 1.11 | 1.11 | 1.11 | 1.11 | 1.11 | 1.11 | 1.11 | 1.11 | 1.11 |
| **Biochar** | 0.28 | 0.00 | 0.00 | 0.28 | 0.00 | 0.00 | 0.28 | 0.00 | 0.00 | 0.28 | 0.00 | 0.00 | 0.28 | 0.00 | 0.00 | 0.28 | 0.00 | 0.00 | 0.28 | 0.00 | 0.00 | 0.28 | 0.00 | 0.00 |
| **Residue** | 0.00 | 0.23 | 0.00 | 0.00 | 0.23 | 0.00 | 0.00 | 0.23 | 0.00 | 0.00 | 0.23 | 0.00 | 0.00 | 0.23 | 0.00 | 0.00 | 0.23 | 0.00 | 0.00 | 0.23 | 0.00 | 0.00 | 0.23 | 0.00 |
| **Pesticide** | 0.04 | 0.04 | 0.04 | 0.04 | 0.04 | 0.04 | 0.04 | 0.04 | 0.04 | 0.03 | 0.03 | 0.03 | 0.04 | 0.04 | 0.04 | 0.04 | 0.04 | 0.04 | 0.04 | 0.04 | 0.04 | 0.03 | 0.03 | 0.03 |
| **Machinery** | 0.33 | 0.33 | 0.33 | 0.33 | 0.33 | 0.33 | 0.33 | 0.33 | 0.33 | 0.33 | 0.33 | 0.33 | 0.54 | 0.54 | 0.54 | 0.54 | 0.54 | 0.54 | 0.54 | 0.54 | 0.54 | 0.54 | 0.54 | 0.54 |
| **Carbon Sink** | **SOC (Annual)** | -3.91 | -3.51 | -1.76 | -3.78 | -3.60 | -2.21 | -4.59 | -3.72 | -2.26 | -3.43 | -2.96 | -1.53 | -3.76 | -2.53 | -1.47 | -3.76 | -3.49 | -1.38 | -2.30 | -1.53 | -0.43 | -3.67 | -2.91 | -0.70 |
| **Carbon Footprint**  **(C source – C sink)** | | -1.00 | -0.65 | 0.78 | -0.80 | -0.76 | 0.36 | -2.24 | -1.46 | -0.28 | -0.34 | -0.09 | 1.03 | -0.37 | 0.72 | 1.49 | -0.36 | -0.25 | 1.62 | 0.47 | 1.15 | 1.96 | -0.29 | 0.35 | 2.27 |
